# Supplementary material
Source: publisher site journal article supplement (https://www.dovepress.com/get_supplementary_file.php?f=463739.docx)
Supplement: Supplementary file 1 [file get_supplementary_file.php]

**Number of elements in the Supplementary File: 3**

Additional file 1

**Table A1.** Flow of mandatory mask-wearing in South Korea

| Flow | Effective date | Policy of mandatory mask-wearing |
| --- | --- | --- |
| Step 1 | September 26, 2022. | Mandatory outdoor mask-wearing requirement lifted |
| Step 2 | January 30, 2023. | Indoor mask-wearing requirement lifted (excluding public transportation and medical facilities |
| Step 3 | March 20, 2023. | Expansion of indoor mask-wearing requirement exemption (including public transportation and pharmacies within large supermarkets) |
| WHO declaration | May 4, 2023. | WHO PHEIC (Public Health Emergency of International Concern) declaration of an end to the COVID-19 pandemic |
| Korean government's declaration | May 11, 2023. | Korean government's endemic declaration (downgrading the infectious disease crisis alert level from “serious” to “caution”) |
| Step 4 | June 1, 2023. | Further expansion of indoor mask-wearing requirement exemption (including clinics and pharmacies) |
| Step 5 | As of January 7, 2024. | Mandatory indoor mask-wearing is maintained only for hospitals and higher-tier medical institutions |

**Table A2.** Survey details

| Period | Number of eligible cases | Number of contacted respondents | Number of respondents interviewed successfully | CON2*  (%) | COOP2* (%) | RR3*  (%) |
| --- | --- | --- | --- | --- | --- | --- |
| January 31– February 2, 2023 | 36,983 | 11,441 | 1,001 | 30.9 | 8.7 | 2.7 |

These surveys did not allow for partial interviews.

* Contact Rate 2 (CON2), Cooperation Rate 2 (COOP2), and Response Rate 3 (RR3) were calculated according to the American Association for Public Opinion Research (AAPOR) criteria.

**Additional File 2**

**Questionnaire**

**Keeping wearing mask**

Do you plan to keep wearing facemasks indoors or not in the future?

1. Wearing a face mask
2. Not wearing face masks

**Affective risk perception of COVID-19**

How worried are you about the possibility of contracting COVID-19?

1. Very worried
2. Somewhat worried
3. Not really worried
4. Not worried at all

**Cognitive risk perception of COVID-19**

How likely do you think you will be infected with COVID-19?

1. Very likely
2. Somewhat likely
3. Not very likely
4. Not likely at all

**Perceived performance of government’s countermeasures**

Do you think that the incumbent government is taking appropriate actions to address COVID-19?

1. Taking appropriate action
2. Taking inappropriate action
3. Neutral
4. Do not know

**Political self-identification**

To which of the following categories do your political tendencies belong?

1. Very conservative
2. Conservative
3. Moderate
4. Liberal
5. Very liberal

6. Do you not know/decline to answer?

**Gender**

Please select your sex.

1. Male
2. Female

**Age**

Please specify your age.

**Occupation**

What is your occupation?

1. Farming/forestry/fishery
2. Self-employed
3. Blue-collar (sales/services, functional/skilled workers, and general workers)
4. White collar (office/technical position, management, professional/freelancer).
5. Homemaker
6. Student
7. Unemployed
8. Retired
9. Other (specify _____________ )

**Self-reported household economic status**

If you divide the standard of living of Korean people into five levels—upper, upper middle, middle, lower middle, and lower—to what level do you think your household’s living standards belong?

1. Upper
2. Upper middle
3. Middle
4. Lower middle
5. Lower

**Educational attainment**

What is the highest level of education you have completed?

1. Less than middle school graduation
2. High school graduation
3. Attended or graduated from college
4. Attending or graduating from graduate school

**Area**

In which region do you live? Please answer this question based on your comments.

*We do not have your location information because respondents were randomly selected and contacted via phone.

1. Seoul

2. Busan

3. Daegu

4. Incheon

5. Gwangju

6. Daejeon

7. Ulsan

8. Sejong

9. Gyeonggi

10. Gangwon

11. Chungbuk

12. Chungnam

13. Jeonbuk

14. Jeonnam

15. Gyeongbuk

16. Gyeongnam

17. Jeju
